# Supplementary material
Source: PubMed Central journal article supplement (PMC5427282)
Supplement: 10.1074_M117.782284_jbc.M117.782284-1.pdf [file 10.1074_M117.782284_jbc.M117.782284-1.pdf]

Assembly-induced folding regulates interleukin 12 biogenesis and secretion

**Susanne Reitberger<sup>1</sup>, Pascal Haimerl<sup>2</sup>, Isabel Aschenbrenner<sup>1</sup>, Julia Esser-von Bieren<sup>2</sup>, and Matthias J. Feige<sup>1</sup>**

From the <sup>1</sup>Center for Integrated Protein Science at the Department of Chemistry and Institute for Advanced Study, Technical University of Munich, 85748 Garching, Germany and the <sup>2</sup>Center of Allergy & Environment (ZAUM), Technical University of Munich and Helmholtz Zentrum München, 80802 Munich, Germany

Running title: *molecular mechanism of IL12 biogenesis*

To whom correspondence should be addressed: Prof. Matthias J. Feige, Department of Chemistry and Institute for Advanced Study, Technical University of Munich, Lichtenbergstr. 2a, 85748 Garching, Germany; Telephone: (+4989) 289-10595; Fax: (+4989) 289-10698; E-mail: matthias.feige@tum.de

**- Supplemental Data -**

## Supplementary Figures

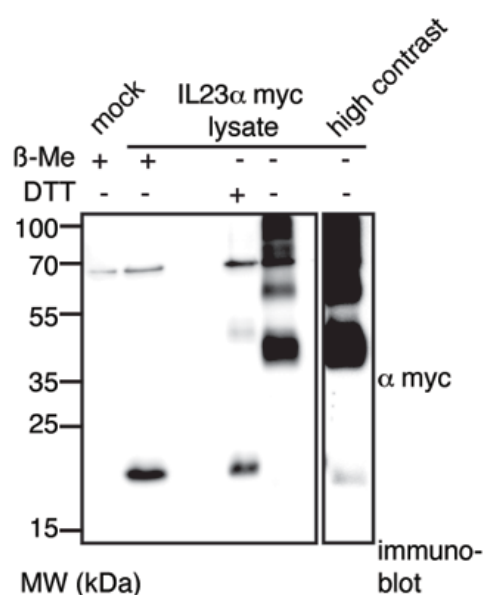

**Supplemental Figure 1.** Isolated IL23 $\alpha$  shows comparable redox species to isolated IL12 $\alpha$ . The oxidation state of IL23 $\alpha$  with a C-terminal Myc-tag was analyzed by non-reducing SDS-PAGE. Where indicated, samples were treated with  $\beta$ -mercaptoethanol ( $\beta$ -Me) after cell lysis to provide a size standard for completely reduced proteins or cells were treated with DTT for 1 h before lysis to reduce disulfide bonds in the cell. 2% lysate was applied to the gel and blotted with anti-Myc antibody. To make the monomeric IL23 $\alpha$  visible, a high contrast image is shown on the right.

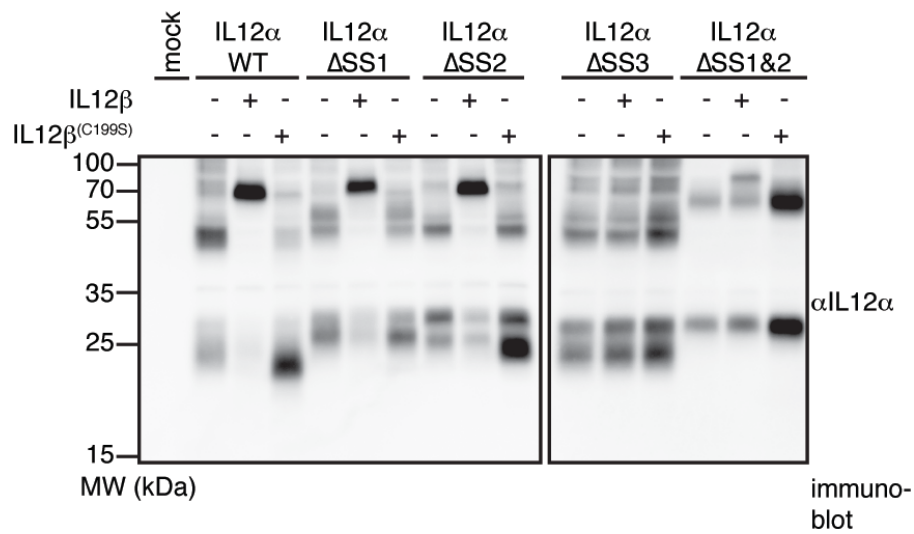

**Supplemental Figure 2.** Influence of IL12 $\alpha$  disulfide bridges on IL12 $\alpha$  redox status in the presence of IL12 $\beta$ . The redox status of IL12 $\alpha$  alone and in the presence of IL12 $\beta$  or IL12 $\beta^{C199S}$  was analyzed by non-reducing SDS-PAGE. Samples were treated with brefeldin A for 1 h before lysis to inhibit protein secretion. 293T cells were co-transfected with the indicated IL12 $\alpha$ -/ $\beta$ -subunits and 2% lysate was applied to the gel and blotted with anti-IL12 $\alpha$  antibody.

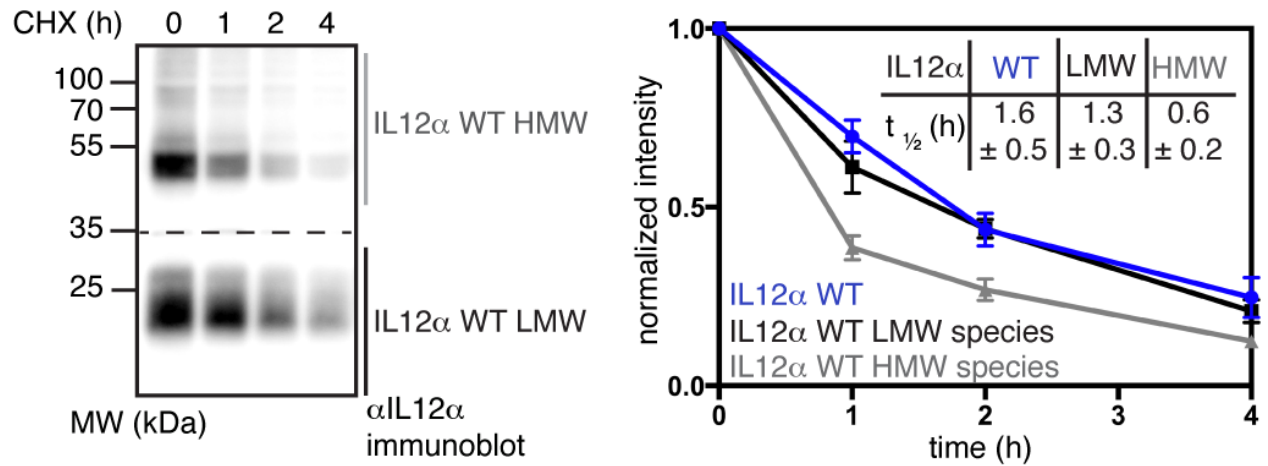

**Supplemental Figure 3.** Measurement of IL12 $\alpha$  redox species turnover by cycloheximide (CHX) chase assays. For CHX chases 293T cells were transfected with IL12 $\alpha$  WT and incubated with CHX for up to 4 h. Cell lysates were analyzed under non-reducing conditions by immunoblotting with anti-IL12 $\alpha$  antibody. The anti-IL12 $\alpha$  immunoblot signal was normalized to the signal of high molecular weight (HMW) (larger than 35 kDa) and low molecular weight (LMW) species (smaller than 35 kDa) which were present at the start of the chase. Half-lives of LMW (■) and HMW (▲) species were compared with IL12 $\alpha$  WT (●) from Fig 4A, ( $n=4\pm\text{SEM}$ ). Half-lives from exponential fits of the curves ( $\pm\text{SD}$ ) are shown in the table.
